# Supplementary material for: A simple SVS method for obtaining large-scale WO3 nanowire cold cathode emitters at atmospheric pressure and low temperature
Source: Royal Society of Chemistry journal article supplement (doi:10.1039/c4ce01843e), 2014-11-28
Supplement: c4ce01843e1.pdf [file c4ce01843e1.pdf]

## ***Supporting Information***

# **A Simple SVS Way to Obtain Large-scale WO<sub>3</sub> Nanowire Cold Cathode Emitters at Atmospheric Pressure and Low Temperature**

Zhuo Xu, Fei Liu\*, Daokun Chen, Tongyi Guo, Shunyu Jin, Shaozhi Deng,  
Ningsheng Xu, Jun Chen\*

### **Table of Contents**

|                                                                                  |   |
|----------------------------------------------------------------------------------|---|
| Table of contents.....                                                           | 1 |
| Stable emission behaviors of the WO <sub>3</sub> nanowires after treatments..... | 2 |
| Figure Captions.....                                                             | 3 |
| J-E and FN plots of the WO <sub>3</sub> nanowires after treatments.....          | 4 |

## **Stable emission behaviors of the WO<sub>3</sub> nanowires after treatments**

A long-term conditioning procedure of 6 hours was performed on the WO<sub>3</sub> nanowires before their J-E curves and FN plots were recorded. The treating field was kept at 4.4 V/ $\mu\text{m}$  in a continuous treatment procedure. After the treatment was over, the J-E curves and FN plots of one sample was obtained, as shown in Fig. S1. It is obviously seen that these curves are stable and repeatable, which suggests this conditioning procedure have reached our treatment goal. In this case, a typical J-E curve and their corresponding FN plots are chosen to appear in the manuscript because they can represent the true emission properties of the WO<sub>3</sub> nanowires.

## **Figure captions**

Figure S1. J-E curves of the WO<sub>3</sub> nanowires in several measurement cycles. Their corresponding FN plots are shown in the inset.

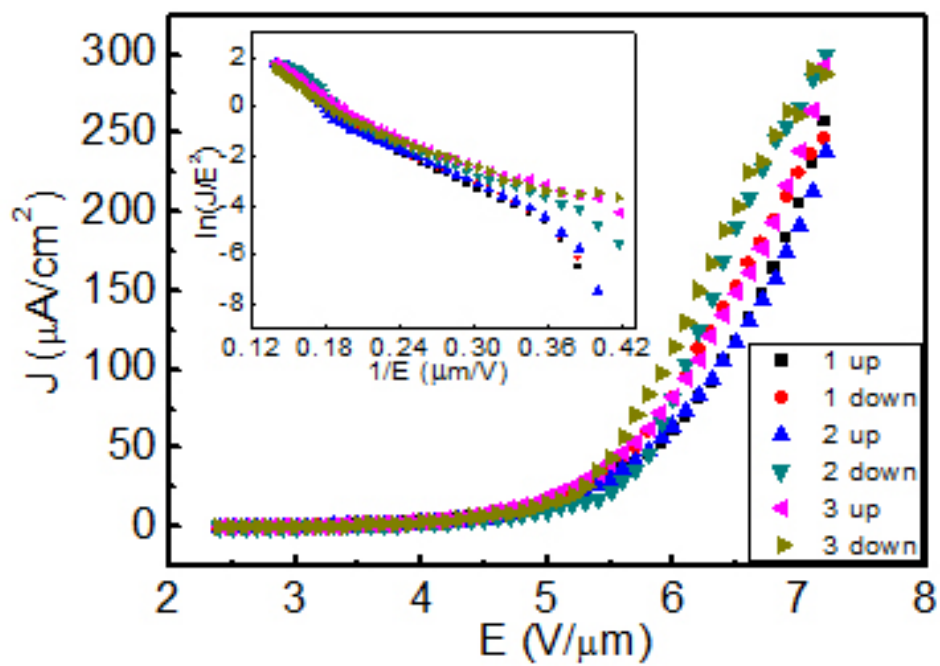

Figure S1

(Z. Xu et al., *submitted to CrystEngComm*)
